1           **Neuronal origin of the temporal dynamics of spontaneous**  
2                           **BOLD activity correlation**

3  
4  
5                   Teppei Matsui<sup>1,2\*</sup>, Tomonari Murakami<sup>1,2</sup> and Kenichi Ohki<sup>1,2\*</sup>

- 6   1. Department of Physiology, The University of Tokyo School of Medicine, Tokyo  
7       113-0033, Japan  
8   2. Department of Molecular Physiology, Graduate School of Medical Sciences,  
9       Kyushu University, Fukuoka, Japan

10  
11  
12   **Send Correspondence To:**

13   Teppei Matsui, Ph.D. (Email: [tematsui@m.u-tokyo.ac.jp](mailto:tematsui@m.u-tokyo.ac.jp))

14   or

15   Kenichi Ohki, M.D, Ph.D. (Email: [kohki@m.u-tokyo.ac.jp](mailto:kohki@m.u-tokyo.ac.jp))

16   Department of Physiology

17   The University of Tokyo School of Medicine

18   Tokyo 113-0033, Japan

19   Phone: (+81)-3-5841-3459

20 **Abstract (196/200 words)**

21 Resting-state functional connectivity (FC) has become a major fMRI method to study  
22 network organization of human brains. There is recent interest in the temporal  
23 fluctuations of FC calculated using short time-windows (“dynamic FC”) because it  
24 could provide information inaccessible with conventional “static” FC that is typically  
25 calculated using the entire scan lasting several tens of minutes. Although multiple  
26 studies have revealed considerable temporal fluctuations in FC, it is still unclear  
27 whether the fluctuations of FC measured in hemodynamics reflect the dynamics of  
28 underlying neural activity. We addressed this question using simultaneous imaging of  
29 neuronal calcium and hemodynamic signals in mice, and found coordinated temporal  
30 dynamics of calcium FC and hemodynamic FC measured in the same short time  
31 windows. Moreover, we found that variation in transient neuronal coactivation patterns  
32 (CAPs) was significantly related to temporal fluctuations of sliding window FC in  
33 hemodynamics. Finally, we show that observed dynamics of FC cannot be fully  
34 accounted for by simulated data assuming stationary FC. These results provide evidence  
35 for the neuronal origin of dynamic FC and further suggest that information relevant to  
36 FC is condensed in temporally sparse events that can be extracted using a small number  
37 of time points.

38

39

40 Keywords: calcium imaging, BOLD, resting state, functional connectivity, stationarity

41

## 42 **Introduction**

43 Resting state functional connectivity (FC) uses temporal correlation of spontaneous  
44 neuronal activity to assess network organization of brain regions in a non-invasive  
45 manner (Fox and Raichle 2007). Traditionally, FC has been calculated using all time  
46 points in a scan that typically lasts between several minutes to tens of minutes (Biswal  
47 et al. 1995; Fox et al. 2005; Van Dijk et al. 2010). Such “static” FC has been shown to  
48 largely reflect anatomical connectivity (Adachi et al. 2012; Honey et al. 2009; Matsui et  
49 al. 2012; Matsui et al. 2011; Vincent et al. 2007). Recently, in contrast to traditional  
50 analysis of “static” FC, the temporal fluctuation of FC across short time windows is  
51 increasingly recognized as a useful aspect of FC (Allen et al. 2014; Hutchison et al.  
52 2013; Zalesky et al. 2014). Such “dynamic” FC calculated using short time-windows  
53 could provide information that is inaccessible with static FC about the functional  
54 network organizations of healthy and diseased brains (Calhoun et al. 2014; Preti et al.  
55 2016). The presence of temporal fluctuations in FC has also informed theoreticians to  
56 constrain realistic models of brain networks (Deco et al. 2013; Hansen et al. 2015;  
57 Messé et al. 2014).

58 However, despite growing interest, the neurophysiological basis of dynamic FC is  
59 still weak. Previous attempts to investigate neural origin of dynamic FC by  
60 simultaneous measurement of electrophysiological and functional magnetic resonance  
61 imaging (fMRI) are limited in several ways (Lu et al. 2007; Pan et al. 2011;  
62 Tagliazucchi et al. 2012b; Thompson et al. 2013). In some studies, electrophysiological  
63 recording was limited to a small number of recording sites due to technical difficulty  
64 (Lu et al. 2007; Pan et al. 2011; Thompson et al. 2013); hence, information on the  
65 global pattern of neuronal activity was lacking. In another study, electrophysiological  
66 signals were obtained with an electroencephalogram, which records global neuronal  
67 activity but lacks precise spatial information (Tagliazucchi et al. 2012b). Thus, the link  
68 between temporal fluctuations of FC in hemodynamics and that of large-scale neuronal  
69 activity has not been adequately proven.

70 Several studies have also questioned whether the apparent “dynamics” of FC  
71 calculated using the sliding window method is related to temporal instability of  
72 spontaneous brain network (Hindriks et al. 2016; Laumann et al. 2016). While many  
73 studies have attributed temporal fluctuations of sliding window FC to non-stationarity  
74 of spontaneous neuronal activity correlation (Allen et al. 2014; Zalesky et al. 2014),

75 some recent studies have demonstrated that the temporal fluctuations of FC observed in  
76 the real and the simulated data, which is stationary by construction, are statistically  
77 indistinguishable (Hindriks et al. 2016; Laumann et al. 2016). Furthermore, Laumann  
78 and colleagues have shown that, in the human resting-state fMRI data, a large portion of  
79 non-stationarity in FC is attributed to head motion, and eliminating data with excessive  
80 head motion substantially decreases the non-stationarity of FC (Laumann et al. 2016).  
81 Therefore, not only the neuronal basis of dynamic FC, but also the existence of  
82 statistical non-stationarity of FC, or at least the capability of sliding window methods to  
83 detect the non-stationarity, is called into question.

84 In the present study, we addressed these questions using simultaneous imaging of  
85 neuronal calcium and blood oxygen level dependent (BOLD) hemodynamic signals in  
86 the entire neocortex of transgenic mice expressing a genetically encoded calcium  
87 indicator (Matsui et al. 2016; Vanni and Murphy 2014; White et al. 2011). In the present  
88 experimental setup, wide-field calcium signal provided access to neuronal activity at  
89 higher temporal resolution and signal-to-noise ratio compared to that of hemodynamic  
90 signal (Matsui et al. 2016; Murakami et al. 2015; Tohmi et al. 2014; Vanni and Murphy  
91 2014). Moreover, unlike human fMRI data, in the present dataset, mice were tightly  
92 head-fixed and lightly anesthetized; thus, excluding head motions from contaminating  
93 FC. Main findings of the present study are as follows. First, we found consistency  
94 between the dynamics of FC calculated using calcium and hemodynamic signals,  
95 suggesting the neuronal origin of the temporal fluctuations of hemodynamic FC. Second,  
96 we found that temporal fluctuations of the spatial pattern of transient neuronal  
97 coactivations as measured in calcium signal were significantly correlated with temporal  
98 fluctuations of hemodynamic FC. Finally, we found that statistical properties of sliding  
99 window FC were significantly different between the real and the simulated data  
100 suggesting non-stationarity of resting-state FC.

101

## 102 **Materials and Methods**

### 103 *Animals*

104 Emx1-IRES-cre and Ai38 (Zariwala et al. 2012) mice were obtained from the Jackson  
105 Laboratory (Sacramento, CA). These mice were crossed and all cortical excitatory  
106 neurons expressed GCaMP3. Mice (P60–P90) were prepared for *in vivo* wide-field  
107 simultaneous imaging. Anesthesia was induced with isoflurane (3 %) and maintained  
108 with isoflurane (1 – 2 % in surgery, 0.5 – 0.8 % during imaging) and chlorprothixene  
109 (0.3 – 0.8 mg/kg, intramuscular injection). For simultaneous imaging of calcium and  
110 hemodynamic signals, a custom-made metal head plate was attached to the skull using  
111 dental cement (Sun Medical Company, Ltd, Shiga, Japan) and a large craniotomy was  
112 made over the whole cortex. The craniotomy was sealed with 1 % agarose and a glass  
113 coverslip. During the imaging, body temperature was maintained by a heat pad. All  
114 experiments were carried out in accordance with the NIH Guide for the Care and Use of  
115 Laboratory Animals, the institutional animal welfare guidelines set forth by the Animal  
116 Care and Use Committee of Kyushu University, and the study was approved by the  
117 Ethical Committee of Kyushu University.

118

### 119 *Simultaneous Calcium and Intrinsic Signal Imaging*

120 The data for simultaneous imaging of calcium and hemodynamic signals was taken  
121 from a published report (Matsui et al. 2016). Briefly, simultaneous imaging of calcium  
122 and intrinsic signals *in vivo* was performed using a macro zoom fluorescence  
123 microscope (MVX-10, Olympus, Tokyo, Japan) or an upright fluorescence microscope  
124 (ECLIPSE Ni-U, Nikon, Tokyo, Japan), equipped with a 1x objective. A 625 nm LED  
125 light source was used to obtain intrinsic signals. GCaMP was excited by a 100 W  
126 mercury lamp through a GFP mirror unit (Olympus). Intrinsic signal data was collected  
127 at a frame rate of 5 Hz using a CCD camera (1,000m; Adimec, Boston, MA, U.S.A.)  
128 and calcium signal data was collected at a frame rate of 10 Hz using a CCD camera  
129 (DS-Qi1 Mc; Nikon). The emission filters were 625 nm long pass (SC-60, Fuji film,  
130 Tokyo, Japan) for intrinsic signals, and 505-535 nm band pass (FF01-520/35-25,  
131 Semrock, Lake Forest, Illinois) for calcium signals. Data were acquired for 30-60 min  
132 per animal (5 min per scan).

133

### 134 *Data Preprocessing*

135 All data analyses were conducted in Matlab (MathWorks, Natick, MA) using a method  
136 described previously (Matsui et al. 2016). Briefly, all the image frames were corrected  
137 for possible within-scan motion by rigid-body transformation. Calcium and  
138 hemodynamic images were then coregistered by rigid-body transformation using  
139 manually selected anatomical landmarks that were visible in both images (e.g.,  
140 branching points of blood vessels). All of the images were then spatially down-sampled  
141 by a factor of two. Pixels within the cortex (at this point including large blood vessels  
142 including the sinus) were extracted manually. For both calcium and hemodynamics,  
143 slow drift in each pixel's time course was removed using a high-pass filter ( $> 0.01$  Hz,  
144 second order Butterworth. No low-pass filter was used). After filtering, each pixel's  
145 time course was normalized by subtracting the mean across time and then dividing by  
146 the standard deviation across time. Global signal regression was conducted by  
147 regressing out the time course of average signal within the brain from each pixel's time  
148 course. Finally, hemodynamic signal was multiplied by -1 to set the polarity of the  
149 activity change equal to that in the calcium signal.

150

#### 151 *Extraction of Region-of-Interest (ROI) Time Courses*

152 Selection of ROI and time courses are conducted as described previously (Matsui et al.  
153 2016). Briefly, 38 cortical regions (19 for each hemisphere) were selected as ROIs  
154 based on a previous mouse functional connectivity study (White et al. 2011)  
155 (Supplementary Fig. 1). Each ROI was a  $6 \times 6$  pixel square ( $0.5 \text{ mm} \times 0.5 \text{ mm}$ )  
156 centered at a selected coordinate. The time course for each ROI was calculated by  
157 averaging the time courses of pixels within the ROI that corresponded to gray matter.  
158 ROIs located outside of the FOV were discarded.

159

#### 160 *Analysis of FC*

161 For both calcium and hemodynamic signals, FC was calculated using a standard  
162 seed-based correlation method (Matsui et al. 2016). First, the correlation coefficient  
163 between the time course of a selected ROI ("seed time course") and the time course of  
164 every pixel within the brain was calculated. Second, FC values were averaged across  
165 scans to obtain FC values for each pixel. The spatial correlation between FC maps of  
166 calcium and hemodynamic signals was calculated by taking the pixel-by-pixel  
167 correlation coefficient between the two maps using all the gray matter pixels. FC with

168 short time window was obtained by taking correlation coefficient using all the frames  
169 within a 30-sec window. Steps of 3 sec and 30 sec were used for the sliding window and  
170 non-overlapping window, respectively. Scan-shifted control was calculated by shifting  
171 the scan number of hemodynamics data relative to simultaneously obtained calcium  
172 data.

173

#### 174 *Analysis of CAPs*

175 CAP analysis was adopted from previous fMRI studies (Liu and Duyn 2013). Briefly,  
176 calcium time course from each ROI was z-normalized. Then, frames corresponding to  
177 peaks of the time course whose height exceeded 2 s.d. were considered CAPs of the  
178 ROI. For a given ROI, comparison between FC map within a sliding window and CAPs  
179 contained in the window was conducted by calculating spatial correlation between the  
180 FC map and the summed spatial pattern of CAPs contained within the window (i.e.  
181 adding all the frames corresponding to CAPs within the window). Comparison between  
182 CAPs and short window FC using all ROIs were performed as follows. First, for a given  
183 scan, for all the ROIs, CAPs were calculated for calcium signal. For each ROI, multiple  
184 CAPs were averaged to yield mean CAP for the scan ( $CAP_{scan}$ ). For hemodynamic  
185 signal, FC map was calculated for each ROI ( $FC_{scan}$ ). For a given pairs of ROIs ( $i$  and  $j$ ),  
186 correlation between the pair of corresponding  $CAP_{scan}$  was calculated  $[R(CAP_{scan})_{ij}]$ .  
187 Corresponding correlation between the pair of FC maps was also calculated for each  
188 pair of ROIs  $[R(FC_{scan})_{ij}]$ . Second, for a given 30-sec window in the scan, for all the  
189 ROIs, CAPs were detected for calcium signal. For each ROI, multiple CAPs were  
190 averaged to yield mean CAP within the window ( $CAP_{window}$ ). FC map was also  
191 calculated using hemodynamic signal within the window ( $FC_{window}$ ). Then, for a given  
192 pairs of ROIs ( $i$  and  $j$ ), correlation between the pair of corresponding  $CAP_{window}$  was  
193 calculated  $[R(CAP_{window})_{ij}]$ . Then difference between the  $R(CAP_{window})_{ij}$  and  $R(CAP_{scan})_{ij}$   
194 was taken as the index of deviation from the mean pattern for the given window  
195  $[\Delta CAP_{ij} = R(CAP_{window})_{ij} - R(CAP_{scan})_{ij}]$ . Similarly,  $\Delta FC_{ij}$  was obtained by subtracting  
196  $R(FC_{scan})_{ij}$  from  $R(FC_{window})_{ij}$ . Finally, correlation coefficient between non-diagonal  
197 elements of the matrices of  $\Delta CAP$  and  $\Delta FC$  were calculated. When CAPs were absent  
198 for a particular ROI in a time window, that ROI was omitted from the calculation for the  
199 time window.

200

201 ***Cluster Analysis and Kurtosis Analysis***

202 For the state analysis of sliding window FC, we adopted the k-means clustering  
203 algorithm used in the previous studies (Allen et al. 2014; Laumann et al. 2016).  
204 Correlation distance (1-r) was used to compute the separation between each window's  
205 FC-matrix (using all 38 ROIs) and the k-means clustering was iterated 100 times with  
206 random centroid positions to avoid local minima. The windowed FC-matrices were  
207 mean-centered by scan to eliminate scan-level and subject-level features from  
208 contributing the clustering result. K-means clustering was applied in the same manner to  
209 the simulated data that was matched in size to the real data. The cluster validity index  
210 was used to evaluate the quality of clustering for the range of cluster numbers ( $k = 2-10$ ).  
211 The cluster validity index was computed as the average ratio of within-cluster distance  
212 to between-cluster distance.

213 Non-stationarity of spontaneous neuronal signal correlation was assessed by  
214 calculating multivariate kurtosis using the same procedure as described by Laumann  
215 and colleagues (Laumann et al. 2016). One value of kurtosis was calculated for each  
216 FC-matrix (using all 38 ROIs) obtained each scan. The same procedure was applied to  
217 the simulated data that was matched in size to the real data.

218

219 ***Time Course Simulation***

220 To obtain a null dataset to evaluate the non-stationarity of the real data, we constructed  
221 simulated time courses using a method developed by Laumann and colleagues  
222 (Laumann et al. 2016). Briefly, random normal deviates having the same dimensionality  
223 as a real dataset are sampled. These time courses are multiplied in the spectral domain  
224 by the average power spectrum of the (bandpass filtered) real data. These time courses  
225 are then projected onto the eigenvectors derived from the covariance matrix of the real  
226 data. This procedure produces simulated data that are stationary by construction but  
227 matched to real data in the covariance structure and mean spectral content.

228



## 229 **Results**

### 230 *Consistent FC dynamics in calcium and hemodynamic signals*

231 Transgenic mice expressing GCaMP in neocortical neurons were used to simultaneously  
232 measure neuronal calcium signal and hemodynamics in a large portion of bilateral  
233 neocortex (Fig. 1A) (Matsui et al. 2016). Mice were lightly anesthetized and head-fixed  
234 with metal plates so that head-motion could not contaminate the signals. We used  
235 sliding window correlation (30 sec window at 3 sec steps) to examine if FC in mice  
236 exhibited dynamic changes. Consistent with previous reports in humans (Allen et al.  
237 2014; Chang and Glover 2010; Zalesky et al. 2014) and other animals (Hutchison et al.  
238 2014; Majeed et al. 2009), FC between pairs of ROIs calculated with sliding windows  
239 showed considerable variability over different time points both in calcium signal and  
240 hemodynamics (Fig. 1B-C). Consistent with the notion that variability in hemodynamic  
241 FC arises from underlying neuronal activity, we found close matches between dynamics  
242 of FC in calcium and hemodynamics (correlation coefficients, 0.631 and 0.675 for Figs.  
243 1B and 1C, respectively). Correlation between the time courses of calcium FC and  
244 hemodynamic FC was significantly larger for the data than that of the scan-shifted  
245 control ( $P < 10^{-20}$ , Kolmogorov-Smirnov test; Fig. 1D).

246 To further examine the consistency between the dynamics of FC in calcium and  
247 hemodynamics in the entire neocortex, we calculated FC among all pairs of ROIs and  
248 compared them across time windows (Fig. 2A-B). The ROI-based FC-matrices in  
249 calcium and hemodynamics both showed variability across time windows. On the other  
250 hand, FC matrices in calcium and hemodynamics within each time window were similar.  
251 If the dynamics of FC in calcium and hemodynamics were matched, the similarity  
252 between calcium and hemodynamic FC in the same time window should be higher than  
253 that calculated using different time windows (e.g., similarity between  $\text{Ca-FC}_{\text{window\#1}}$  and  
254  $\text{Hemo-FC}_{\text{window\#1}}$  would be higher than the similarity between  $\text{Ca-FC}_{\text{window\#1}}$  and  
255  $\text{Hemo-FC}_{\text{window\#2}}$ ). Otherwise, the similarity between FC-matrices in calcium and  
256 hemodynamics merely reflects the overall similarity of FC in calcium and  
257 hemodynamics but not the coordinated dynamics of calcium and hemodynamic FC.  
258 Across all the data, we found that the distribution of the correlation coefficient between  
259 the FC-matrices in calcium and hemodynamics was shifted toward positive values  
260 compared with that calculated with the scan-shifted data ( $P < 10^{-14}$ ,  
261 Kolmogorov-Smirnov test; Fig. 2C). The difference between the real data and the

262 trial-shifted data was also consistently positive across animals ( $p < 0.0156$ ,  $n = 7$  mice,  
263 sign-rank test; Fig. 2D) and was seen across various window sizes ranging from 1 sec to  
264 60 sec (Fig. 2E). Together these results suggest that temporal variability in  
265 hemodynamic FC, as measured with sliding window, arises from neural activity rather  
266 than from movement-related artifacts (Laumann et al. 2016) or non-neuronal  
267 physiological artifacts such as heartbeat and respiration (Bianciardi et al. 2009; Shmueli  
268 et al. 2007).

269

### 270 *Variations in transient neuronal coactivations explained variations in FC*

271 What are the potential neuronal events that create dynamic FC? Recent fMRI studies  
272 proposed that variability in the neuronal coactivation pattern (CAP) of brain areas is  
273 directly reflected in the dynamic change of FC observed with the sliding window  
274 correlation (Liu and Duyn 2013). To address this possibility, we compared sliding  
275 window FC in hemodynamics with the CAPs calculated in the calcium signal. The use  
276 of calcium signal for extracting CAPs allowed us to capture faster spatiotemporal  
277 dynamics than the hemodynamics. More importantly, the use of two different signals  
278 also allowed us to avoid comparing sliding window FC and CAPs that were derived  
279 from the same signals and could lead to circular logic.

280 For each anatomical ROI, we first detected peaks in the calcium signal within a  
281 given time-window and then defined CAPs as the frames in the calcium signal  
282 corresponding to the detected peak locations (Fig. 3A) (Liu and Duyn 2013). Similar to  
283 the previous reports in fMRI (Liu et al. 2013; Liu and Duyn 2013), we found variations  
284 in the spatial patterns of CAPs extracted from the same ROI (Fig. 3A, panels above time  
285 courses). We next examined if the variations of the spatial pattern of CAPs could  
286 explain that of sliding window FC. For each ROI in each 30 sec window, we extracted  
287 CAPs and FC using calcium and hemodynamic signals, respectively. In the example 30  
288 sec windows shown in Figure 3A, time courses of the chosen ROI showed transient  
289 activations that resulted in 11 and 3 frames of CAPs (corresponding to 1.1 and 0.3 sec  
290 of data, respectively). Despite the small number of frames corresponding to CAPs, the  
291 average spatial pattern of CAPs in the time window closely matched the spatial pattern  
292 of hemodynamic FC calculated in the same time window (compare mean CAP and  
293 mean FC in Fig. 3A).

294 To further compare CAPs with sliding window hemodynamic FC across ROIs, we

295 calculated CAPs for all pairs of ROIs and compared them with FC of the same  
296 ROI-pairs in the same time window (Fig. 3B). Across all the data, CAP-matrices and  
297 FC matrices showed high positive correlation (Fig. 3C-D; mean  $R = 0.525$  across  
298 animals) suggesting that CAP and FC calculated using the same sliding window were  
299 similar.

300 The similarity between CAP and FC does not necessarily indicate coordinated  
301 temporal variation between CAPs and FCs in individual time-window, but could result  
302 entirely from similarity between the time-average patterns of CAP and FC. Therefore, to  
303 further examine if coordinated temporal variations in CAPs and FCs exist, we  
304 calculated  $\Delta$ CAP and  $\Delta$ FC by subtracting from each CAP and FC in each time window  
305 the average pattern (i.e. average in the entire scan) of CAP and FC, respectively (Fig.  
306 4A). We found that the distribution of the correlation between  $\Delta$ CAP and  $\Delta$ FC for the  
307 real data was shifted toward positive values whereas the same distribution calculated  
308 using trial-shifted data was centered near zero ( $P < 10^{-30}$ , Kolmogorov-Smirnov test; Fig.  
309 4B). Furthermore, the correlation between  $\Delta$ CAP and  $\Delta$ FC was consistently positive  
310 across all animals ( $P < 0.156$ ,  $n = 7$  mice, sign rank test; Fig. 4C) and was seen across  
311 various sizes of time-windows ranging from 1 to 60 sec (Fig. 4D). Taken together, these  
312 results suggest temporal fluctuations of the spatial pattern of CAPs at least partly  
313 explain temporal fluctuations of hemodynamic FC.

314

### 315 ***Dynamics of FC arise from non-stationarity of resting-state activity***

316 Because FC is estimated by using finite number of time-points, temporal fluctuations of  
317 FC observed in short time-windows could arise from mere sampling error even when  
318 underlying FC is stationary (Laumann et al. 2016). We next addressed whether the  
319 sampling error could explain the dynamics of FC observed in the present data. We  
320 compared two indices used in a previous study, namely cluster validity index and  
321 kurtosis, for real data and simulated data that are matched in spectral and covariance  
322 properties (Fig. 5A) (Laumann et al. 2016). The cluster validity index measures degree  
323 of clustering of multiple sliding window FC calculated within the scan. Note that  
324 smaller cluster validity index indicates more clustering (see Methods for details). For  
325 both calcium and hemodynamic signals, we found cluster validity index of real data to  
326 be significantly smaller than that of simulated data (Fig. 5B), suggesting that the real  
327 data had cluster structure that could not be fully accounted for by sampling error.

328 Similarly, we calculated kurtosis of the covariance matrices of real and simulated data.  
329 If the kurtosis of real data were larger than that of simulated data that is stationary by  
330 construction, the non-stationarity of the real data is implied. We found that the kurtosis  
331 of the real data was significantly higher than that of the simulated data ( $P < 10^{-11}$  for  
332 both, sign rank test,  $n = 64$  scans; Fig. 5C). Together, these results suggest that  
333 dynamics of FC arise from non-stationarity of spontaneous neuronal activity, and  
334 analyses based on sliding window correlation have the potential to detect  
335 non-stationarity.  
336

## 337 **Discussion**

338 In the present study, we used simultaneous imaging of calcium and hemodynamic  
339 signals to show that temporal fluctuations in hemodynamic FC calculated in a short  
340 time window closely follow that of calcium FC, suggesting the neuronal origin of  
341 dynamic FC. We have further shown that the spatial pattern of hemodynamic FC in a  
342 short time window is predicted by averaging transient coactivations in the calcium  
343 signal (CAPs) contained within the same time-window suggesting that temporally  
344 interspersed transient neuronal events underlie resting-state FC. Finally, we have shown  
345 that in both calcium and hemodynamic signals, statistical properties of FC calculated in  
346 a short time window was significantly different from that obtained with simulated  
347 signals that were stationary by construction. These results advocate for the analysis of  
348 the dynamic aspect of FC obtained in human fMRI experiments. Insights of the  
349 neuronal events underlying dynamic FC provided by the present study would also be  
350 informative for developing appropriate analysis methods for dynamic FC.

351

### 352 ***Relationship to previous investigations of the neuronal origin of dynamic FC***

353 To provide direct evidence linking neuronal activity and dynamic FC, several  
354 groups have conducted simultaneous recording of fMRI and local field potential (LFP)  
355 (Lu et al. 2007; Pan et al. 2011; Thompson et al. 2013) or EEG (Chang et al. 2013;  
356 Tagliazucchi et al. 2012b). However, these previous studies were limited in several  
357 ways. Since LFP recordings were limited from a small number of recording sites  
358 whereas EEG recording did not have enough spatial resolution, evidence directly  
359 linking global spatial pattern of neuronal activity with hemodynamic FC has been  
360 lacking. Using simultaneous imaging of calcium and hemodynamic signals, the present  
361 study provides evidence suggesting that temporal variability of hemodynamic FC and  
362 its time-to-time spatial patterns reflect spatial patterns of large-scale neuronal activity.  
363 Moreover, since the present study used anesthetized and head-fixed mice, the results are  
364 unlikely to be attributable to head motion.

365 Recent human fMRI studies have proposed that neuronal activity important for FC  
366 is condensed into transient large scale neuronal coactivations (i.e. CAPs) (Liu and Duyn  
367 2013; Tagliazucchi et al. 2012a; Tagliazucchi et al. 2011). Consistent with this idea,  
368 imaging studies in mice revealed transient neuronal coactivations across brain areas  
369 (Matsui et al. 2016; Mohajerani et al. 2013; Vanni and Murphy 2014). In our previous

370 study, we searched for neuronal coactivations that resembled the spatial patterns of  
371 (static) FC and showed that such neuronal coactivations were converted into spatially  
372 similar hemodynamic signals (Matsui et al. 2016). In the present study, we took a  
373 different approach that was similar to single frame analysis methods employed in recent  
374 human fMRI studies (Karahanoğlu and Van De Ville 2015; Liu et al. 2013; Liu and  
375 Duyn 2013; Tagliazucchi et al. 2011). Instead of specifically looking at neuronal  
376 coactivations that resembled “static” FC, we took all the individual coactivations  
377 (CAPs) into our analysis and showed that variation of the spatial pattern of individual  
378 CAPs across time windows was significantly related to variations of hemodynamic FC  
379 across time windows. Thus, the present findings suggest importance of the development  
380 of analysis that specifically focuses on CAPs (Karahanoğlu and Van De Ville 2015;  
381 Liu et al. 2013). It should be noted that, although statistically significant, the correlation  
382 between  $\Delta$ CAP and  $\Delta$ FC was relatively weak. Part of the reason for this could be  
383 non-neuronal physiological noise that contributed to hemodynamics (Matsui et al. 2016).  
384 In the present study, because of the use of anesthesia and head-fixation, head motion is  
385 unlikely to be the primary source of the non-neuronal noise. However, other  
386 physiological activities, e.g. respiration and heartbeat, are known to affect  
387 hemodynamics (Chang et al. 2009; Chang and Glover 2009) and, thus, likely to affect  
388 temporal fluctuation of hemodynamic FC as well. Our results (i.e. relatively low  
389 correlation between  $\Delta$ CAP and  $\Delta$ FC) indicate that correction for such non-neuronal  
390 physiological noise (Glover et al. 2000) is likely to be essential for the analysis of  
391 dynamic FC.

392

### 393 *Non-stationarity of spontaneous brain activity correlation*

394 It has been of a matter of debate to what extent temporal fluctuations of FC is  
395 attributed to the dynamics of underlying neuronal activity but not to non-neuronal  
396 sources of noise (e.g., head motion, sampling variability; reviewed in (Hutchison et al.  
397 2013)). Laumann and colleagues have reported that most of the temporal fluctuations of  
398 single subject FC is explained by head motion (Laumann et al. 2016). After controlling  
399 for the head motion, Laumann and colleagues have concluded that statistical properties  
400 of resting-state FC in human fMRI is indistinguishable from those obtained with  
401 simulated signals that are stationary by construction. A similar study by Hindriks and  
402 colleagues has also indicated the apparent dynamics of FC calculated with the sliding

403 window method does not necessarily indicate non-stationary dynamics of resting brain  
404 network (Hindriks et al. 2016). However, in terms of spontaneous neuronal activity  
405 itself, there is substantial evidences showing that spontaneous neuronal activity is  
406 non-stationary (Foster and Wilson 2006; Ji and Wilson 2007; Logothetis et al. 2012). In  
407 particular, under both awake and anesthetized states, transient neuronal events such as  
408 sharp-wave-ripples have been shown to produce coordinated activity across the entire  
409 brain (Logothetis et al. 2012). The present results are consistent with these previous  
410 studies supporting the non-stationarity of neuronal activity, and further showed that FC  
411 calculated using such non-stationary neuronal activity also showed non-stationarity, as  
412 expected.

413

#### 414 *Limitations of the study*

415 It should be clearly stated that the present results do not guarantee that sliding window  
416 methods are always capable of detecting non-stationarity in human resting-state fMRI  
417 data. The present study used tightly head-restrained animals and high signal to  
418 noise-ratio (SNR) imaging at a high frame rate (5 and 10 Hz for hemodynamics and  
419 calcium signal, respectively). Compared to the present experimental conditions, overall  
420 SNR in typical human resting-state fMRI is likely to be substantially compromised.  
421 Under such low SNR conditions, it is not clear whether simple sliding window  
422 correlation methods can detect the non-stationarity of FC (Hindriks et al. 2016;  
423 Laumann et al. 2016). With respect to SNR, we expect that the recent development of  
424 high-speed fMRI (Feinberg et al. 2010) will significantly improve the detectability of  
425 non-stationarity. Nevertheless, the present results suggest that, rather than the sliding  
426 window based method, an alternative analysis strategy that directly extracts CAPs from  
427 hemodynamic signals (Karahanoğlu and Van De Ville 2015; Liu et al. 2013; Liu and  
428 Duyn 2013; Tagliazucchi et al. 2012a) may be more appropriate for extracting relevant  
429 information related to the dynamics of FC.

430 It should also be noted that the present results do not claim that dynamic FC has  
431 significant behavioral or cognitive consequences. Instead of examining the potential  
432 relationship between dynamic FC and cognitive dynamics or behavioral variability [see  
433 for recent review (Preti et al. 2016)], here we focused on validating the neuronal origin  
434 of dynamic FC. Experiments under anesthesia greatly reduced potential confounding  
435 factors, such as head motion and arousal state (Hutchison et al. 2014; Laumann et al.

436 2016). Nevertheless, the present wide-field imaging setup can be naturally extended to  
437 awake imaging with task-performing mice (Ferezou et al. 2007; Wekselblatt et al. 2016).  
438 Such experiments would reveal the potential consequences of the dynamics of FC on its  
439 behavioral outcome.  
440



441 **Acknowledgements**

442 We thank A. Honda and Y. Sono for animal care and genotyping; the Research Support  
443 Center, Graduate School of Medical Sciences, Kyushu University, for technical support:  
444 and K. Jimura and Y. Noro for helpful discussion. Support for this work was provided  
445 by grants from Brain Mapping by Integrated Neurotechnologies for Disease Studies  
446 (Brain/MINDS) – Japan Agency for Medical Research and Development (AMED),  
447 Core Research for Evolutionary Science and Technology (CREST) – AMED and  
448 Strategic International Research Cooperative Program (SCIP) – AMED, and Japan  
449 Society for Promotions of Sciences (JSPS) KAKENHI Grants 25221001 and 25117004  
450 (to K.O.); JSPS KAKENHI Grant 17K14931 (to T. Matsui) and JSPS Research  
451 Fellowship 20153597 (to T. Murakami).

## 452 **References**

- 453 Adachi Y, Osada T, Sporns O, Watanabe T, Matsui T, Miyamoto K, Miyashita  
454 Y. 2012. Functional connectivity between anatomically unconnected  
455 areas is shaped by collective network-level effects in the macaque  
456 cortex. *Cereb Cortex*. 22(7):1586-1592.
- 457 Allen EA, Damaraju E, Plis SM, Erhardt EB, Eichele T, Calhoun VD. 2014.  
458 Tracking whole-brain connectivity dynamics in the resting state.  
459 *Cereb Cortex*. 24(3):663-676.
- 460 Bianciardi M, Fukunaga M, van Gelderen P, Horovitz SG, de Zwart JA,  
461 Shmueli K, Duyn JH. 2009. Sources of functional magnetic resonance  
462 imaging signal fluctuations in the human brain at rest: A 7 t study.  
463 *Magn Reson Imaging*. 27(8):1019-1029.
- 464 Biswal B, Yetkin FZ, Haughton VM, Hyde JS. 1995. Functional connectivity  
465 in the motor cortex of resting human brain using echo-planar mri.  
466 *Magn Reson Med*. 34(4):537-541.
- 467 Calhoun VD, Miller R, Pearlson G, Adalı T. 2014. The chronnectome:  
468 Time-varying connectivity networks as the next frontier in fmri data  
469 discovery. *Neuron*. 84(2):262-274.
- 470 Chang C, Cunningham JP, Glover GH. 2009. Influence of heart rate on the  
471 bold signal: The cardiac response function. *Neuroimage*.  
472 44(3):857-869.
- 473 Chang C, Glover GH. 2009. Relationship between respiration, end-tidal co2,  
474 and bold signals in resting-state fmri. *Neuroimage*. 47(4):1381-1393.
- 475 Chang C, Glover GH. 2010. Time-frequency dynamics of resting-state brain  
476 connectivity measured with fmri. *Neuroimage*. 50(1):81-98.
- 477 Chang C, Liu Z, Chen MC, Liu X, Duyn JH. 2013. Eeg correlates of  
478 time-varying bold functional connectivity. *Neuroimage*. 72:227-236.
- 479 Deco G, Ponce-Alvarez A, Mantini D, Romani GL, Hagmann P, Corbetta M.  
480 2013. Resting-state functional connectivity emerges from structurally  
481 and dynamically shaped slow linear fluctuations. *J Neurosci*.  
482 33(27):11239-11252.
- 483 Feinberg DA, Moeller S, Smith SM, Auerbach E, Ramanna S, Gunther M,  
484 Glasser MF, Miller KL, Ugurbil K, Yacoub E. 2010. Multiplexed echo

- 485 planar imaging for sub-second whole brain fmri and fast diffusion  
486 imaging. PLoS One. 5(12):e15710.
- 487 Ferezou I, Haiss F, Gentet LJ, Aronoff R, Weber B, Petersen CC. 2007.  
488 Spatiotemporal dynamics of cortical sensorimotor integration in  
489 behaving mice. Neuron. 56(5):907-923.
- 490 Foster DJ, Wilson MA. 2006. Reverse replay of behavioural sequences in  
491 hippocampal place cells during the awake state. Nature.  
492 440(7084):680-683.
- 493 Fox MD, Raichle ME. 2007. Spontaneous fluctuations in brain activity  
494 observed with functional magnetic resonance imaging. Nat Rev  
495 Neurosci. 8(9):700-711.
- 496 Fox MD, Snyder AZ, Vincent JL, Corbetta M, Van Essen DC, Raichle ME.  
497 2005. The human brain is intrinsically organized into dynamic,  
498 anticorrelated functional networks. Proc Natl Acad Sci U S A.  
499 102(27):9673-9678.
- 500 Glover GH, Li TQ, Ress D. 2000. Image-based method for retrospective  
501 correction of physiological motion effects in fmri: Retroicor. Magn  
502 Reson Med. 44(1):162-167.
- 503 Hansen EC, Battaglia D, Spiegler A, Deco G, Jirsa VK. 2015. Functional  
504 connectivity dynamics: Modeling the switching behavior of the resting  
505 state. Neuroimage. 105:525-535.
- 506 Hindriks R, Adhikari MH, Murayama Y, Ganzetti M, Mantini D, Logothetis  
507 NK, Deco G. 2016. Can sliding-window correlations reveal dynamic  
508 functional connectivity in resting-state fmri? Neuroimage.  
509 127:242-256.
- 510 Honey CJ, Sporns O, Cammoun L, Gigandet X, Thiran JP, Meuli R,  
511 Hagmann P. 2009. Predicting human resting-state functional  
512 connectivity from structural connectivity. Proc Natl Acad Sci U S A.  
513 106(6):2035-2040.
- 514 Hutchison RM, Hutchison M, Manning KY, Menon RS, Everling S. 2014.  
515 Isoflurane induces dose-dependent alterations in the cortical  
516 connectivity profiles and dynamic properties of the brain's functional  
517 architecture. Hum Brain Mapp. 35(12):5754-5775.

- 518 Hutchison RM, Womelsdorf T, Allen EA, Bandettini PA, Calhoun VD,  
519 Corbetta M, Della Penna S, Duyn JH, Glover GH, Gonzalez-Castillo J  
520 et al. 2013. Dynamic functional connectivity: Promise, issues, and  
521 interpretations. *Neuroimage*. 80:360-378.
- 522 Ji D, Wilson MA. 2007. Coordinated memory replay in the visual cortex and  
523 hippocampus during sleep. *Nat Neurosci*. 10(1):100-107.
- 524 Karahanoğlu FI, Van De Ville D. 2015. Transient brain activity disentangles  
525 fmri resting-state dynamics in terms of spatially and temporally  
526 overlapping networks. *Nat Commun*. 6:7751.
- 527 Laumann TO, Snyder AZ, Mitra A, Gordon EM, Gratton C, Adeyemo B,  
528 Gilmore AW, Nelson SM, Berg JJ, Greene DJ et al. 2016. On the  
529 stability of bold fmri correlations. *Cereb Cortex*.
- 530 Liu X, Chang C, Duyn JH. 2013. Decomposition of spontaneous brain  
531 activity into distinct fmri co-activation patterns. *Front Syst Neurosci*.  
532 7:101.
- 533 Liu X, Duyn JH. 2013. Time-varying functional network information  
534 extracted from brief instances of spontaneous brain activity. *Proc Natl  
535 Acad Sci U S A*. 110(11):4392-4397.
- 536 Logothetis NK, Eschenko O, Murayama Y, Augath M, Steudel T, Evrard HC,  
537 Besserve M, Oeltermann A. 2012. Hippocampal-cortical interaction  
538 during periods of subcortical silence. *Nature*. 491(7425):547-553.
- 539 Lu H, Zuo Y, Gu H, Waltz JA, Zhan W, Scholl CA, Rea W, Yang Y, Stein EA.  
540 2007. Synchronized delta oscillations correlate with the resting-state  
541 functional mri signal. *Proc Natl Acad Sci U S A*. 104(46):18265-18269.
- 542 Majeed W, Magnuson M, Keilholz SD. 2009. Spatiotemporal dynamics of low  
543 frequency fluctuations in bold fmri of the rat. *J Magn Reson Imaging*.  
544 30(2):384-393.
- 545 Matsui T, Koyano KW, Tamura K, Osada T, Adachi Y, Miyamoto K, Chikazoe  
546 J, Kamigaki T, Miyashita Y. 2012. Fmri activity in the macaque  
547 cerebellum evoked by intracortical microstimulation of the primary  
548 somatosensory cortex: Evidence for polysynaptic propagation. *PLoS  
549 One*. 7(10):e47515.
- 550 Matsui T, Murakami T, Ohki K. 2016. Transient neuronal coactivations

- 551 embedded in globally propagating waves underlie resting-state  
552 functional connectivity. *Proc Natl Acad Sci U S A*. 113(23):6556-6561.
- 553 Matsui T, Tamura K, Koyano KW, Takeuchi D, Adachi Y, Osada T, Miyashita  
554 Y. 2011. Direct comparison of spontaneous functional connectivity and  
555 effective connectivity measured by intracortical microstimulation: An  
556 fmri study in macaque monkeys. *Cereb Cortex*. 21(10):2348-2356.
- 557 Messé A, Rudrauf D, Benali H, Marrelec G. 2014. Relating structure and  
558 function in the human brain: Relative contributions of anatomy,  
559 stationary dynamics, and non-stationarities. *PLoS Comput Biol*.  
560 10(3):e1003530.
- 561 Mohajerani MH, Chan AW, Mohsenvand M, LeDue J, Liu R, McVea DA,  
562 Boyd JD, Wang YT, Reimers M, Murphy TH. 2013. Spontaneous  
563 cortical activity alternates between motifs defined by regional axonal  
564 projections. *Nat Neurosci*. 16(10):1426-1435.
- 565 Murakami T, Yoshida T, Matsui T, Ohki K. 2015. Wide-field  $ca(2+)$  imaging  
566 reveals visually evoked activity in the retrosplenial area. *Front Mol*  
567 *Neurosci*. 8:20.
- 568 Pan WJ, Thompson G, Magnuson M, Majeed W, Jaeger D, Keilholz S. 2011.  
569 Broadband local field potentials correlate with spontaneous  
570 fluctuations in functional magnetic resonance imaging signals in the  
571 rat somatosensory cortex under isoflurane anesthesia. *Brain Connect*.  
572 1(2):119-131.
- 573 Preti MG, Bolton TA, Van De Ville D. 2016. The dynamic functional  
574 connectome: State-of-the-art and perspectives. *Neuroimage*.
- 575 Shmueli K, van Gelderen P, de Zwart JA, Horovitz SG, Fukunaga M, Jansma  
576 JM, Duyn JH. 2007. Low-frequency fluctuations in the cardiac rate as  
577 a source of variance in the resting-state fmri bold signal. *Neuroimage*.  
578 38(2):306-320.
- 579 Tagliazucchi E, Balenzuela P, Fraiman D, Chialvo DR. 2012a. Criticality in  
580 large-scale brain fmri dynamics unveiled by a novel point process  
581 analysis. *Front Physiol*. 3:15.
- 582 Tagliazucchi E, Balenzuela P, Fraiman D, Montoya P, Chialvo DR. 2011.  
583 Spontaneous bold event triggered averages for estimating functional

- 584 connectivity at resting state. *Neurosci Lett.* 488(2):158-163.
- 585 Tagliazucchi E, von Wegner F, Morzelewski A, Brodbeck V, Laufs H. 2012b.  
586 Dynamic bold functional connectivity in humans and its  
587 electrophysiological correlates. *Front Hum Neurosci.* 6:339.
- 588 Thompson GJ, Merritt MD, Pan WJ, Magnuson ME, Grooms JK, Jaeger D,  
589 Keilholz SD. 2013. Neural correlates of time-varying functional  
590 connectivity in the rat. *Neuroimage.* 83:826-836.
- 591 Tohmi M, Meguro R, Tsukano H, Hishida R, Shibuki K. 2014. The  
592 extrageniculate visual pathway generates distinct response properties  
593 in the higher visual areas of mice. *Curr Biol.* 24(6):587-597.
- 594 Van Dijk KR, Hedden T, Venkataraman A, Evans KC, Lazar SW, Buckner RL.  
595 2010. Intrinsic functional connectivity as a tool for human  
596 connectomics: Theory, properties, and optimization. *J Neurophysiol.*  
597 103(1):297-321.
- 598 Vanni MP, Murphy TH. 2014. Mesoscale transcranial spontaneous activity  
599 mapping in *gcamp3* transgenic mice reveals extensive reciprocal  
600 connections between areas of somatomotor cortex. *J Neurosci.*  
601 34(48):15931-15946.
- 602 Vincent JL, Patel GH, Fox MD, Snyder AZ, Baker JT, Van Essen DC, Zempel  
603 JM, Snyder LH, Corbetta M, Raichle ME. 2007. Intrinsic functional  
604 architecture in the anaesthetized monkey brain. *Nature.*  
605 447(7140):83-86.
- 606 Wekselblatt JB, Flister ED, Piscopo DM, Niell CM. 2016. Large-scale  
607 imaging of cortical dynamics during sensory perception and behavior.  
608 *J Neurophysiol.* 115(6):2852-2866.
- 609 White BR, Bauer AQ, Snyder AZ, Schlaggar BL, Lee JM, Culver JP. 2011.  
610 Imaging of functional connectivity in the mouse brain. *PLoS One.*  
611 6(1):e16322.
- 612 Zalesky A, Fornito A, Cocchi L, Gollo LL, Breakspear M. 2014. Time-resolved  
613 resting-state brain networks. *Proc Natl Acad Sci U S A.*  
614 111(28):10341-10346.
- 615 Zariwala HA, Borghuis BG, Hoogland TM, Madisen L, Tian L, De Zeeuw CI,  
616 Zeng H, Looger LL, Svoboda K, Chen TW. 2012. A cre-dependent

617           gcamp3 reporter mouse for neuronal imaging in vivo. *J Neurosci.*  
618           32(9):3131-3141.  
619  
620

621 **Figure Captions**

622 **Figure 1. Representative dynamics of simultaneously observed calcium and**  
623 **hemodynamic FC. (A)** Experimental setup. The left most panel shows the setup for  
624 simultaneous imaging. Right side shows example calcium time courses for two ROIs  
625 (green and cyan traces indicate M1 and V1 ROIs, respectively. Positions of the ROIs  
626 indicated in the example field of view. See Supplementary Figure 1 for abbreviations).  
627 FC with short time window uses subset of frames contained in short (30 sec) windows  
628 (red dotted squares). Sliding FC for hemodynamic signal was carried out similarly.  
629 **(B)-(C)** Examples dynamics of calcium and hemodynamic FC. (B) FC between right V1  
630 and right AC. (C) FC between left M1 and left pPar. See Supplementary Figure 1 for  
631 ROI positions and abbreviations. **(D)** Histogram of correlation between time courses of  
632 Ca-FC and Hemo-FC for the data (solid line) and the scan-shifted control (dotted line).  
633 Data from all pairs of ROIs for all scans obtained in all mice were used.

634

635 **Figure 2. Significant relationship between calcium and hemodynamic FC**  
636 **calculated in short time windows. (A)-(B)** Example ROI-by-ROI FC matrices for  
637 calcium and hemodynamics for different (non-overlapping) 30 sec windows. FC  
638 matrices were similar for calcium and hemodynamics in the same time window, but not  
639 across different time windows. **(C)** Cumulative histogram of correlation between FC  
640 matrices for calcium and hemodynamics. Dotted line indicates trial-shifted control. **(D)**  
641 Correlation between FC matrices for calcium and hemodynamics was larger for the data  
642 than for the trial-shifted control significantly across animals. **(E)** Correlation between  
643 FC matrices of calcium and hemodynamics was larger for the data than the trial-shifted  
644 control across different window-sizes (1, 2, 3, 5, 6, 10, 12, 15, 20, 30 and 60 sec). Error  
645 bars indicate s.e.m. across animals (n = 7).

646

647 **Figure 3. Comparison of calcium CAPs and hemodynamic FC across**  
648 **time-windows. (A)** Procedure for detection of CAPs in calcium signal. For a given ROI,  
649 a calcium time course was extracted and z normalized (green time courses). Then, peaks  
650 exceeding 2 s.d. (red dots) were extracted. The frames corresponding to the peaks were  
651 considered CAPs (panels above the time courses). For each window, CAPs in calcium  
652 signal were averaged to obtain mean calcium CAP. Hemodynamic CAPs were  
653 calculated similarly (see Methods). Maps of Ca-FC and Hemo-FC were also calculated



654 using the same time window. **(B)** Schematics to show the procedure of comparing  
655 calcium CAP and Hemo-FC across all ROI pairs in each time window. In each 30 sec  
656 time window, mean calcium CAPs and Hemo-FC maps were calculated for all ROIs as  
657 seeds (left). Then, for each seed-ROI  $j$ , calcium CAP and Hemo-FC values in ROI  $i$   
658 were extracted to obtain a pair of CAP-FC values for the ROI-pairs  $(i, j)$  (middle).  
659 Finally, for each time-window, CAP-FC values were compared across all pairs of ROIs  
660 (right). **(C)** Histograms of correlation between CAP and Hemo-FC for all time windows  
661 across all animals. Vertical line indicates mean across time windows. **(D)** Mean  
662 correlation between CAP and Hemo-FC across animals. Error bar indicates s.e.m.  
663 across animals ( $n = 7$ ).

664

665 **Figure 4. Temporal fluctuations in calcium CAPs and Hemo-FC was significantly**  
666 **related.** **(A)** Schematics of the analysis. In each 30 sec time-window, mean calcium  
667 CAP and Hemo-FC were calculated (indicated as window CAP and window FC,  
668 respectively). From window CAP and window FC, average calcium CAP and average  
669 Hemo-FC that were calculated using the entire scan, in which the 30-sec window  
670 belongs to, were subtracted to obtain maps of  $\Delta$ CAP and  $\Delta$ FC, respectively. Finally,  
671 values of  $\Delta$ CAP and  $\Delta$ FC were compared across ROI pairs similarly as in Figure 3B.  
672 **(B)** Histograms of correlation between  $\Delta$ CAP and  $\Delta$ FC for all time windows across all  
673 animals. Vertical lines indicate mean across time windows. Solid and dotted lines  
674 indicate real and trial-shifted data, respectively. **(C)** Correlation between  $\Delta$ CAP and  
675  $\Delta$ FC was significantly larger for the data than for trial-shifted control across animals.  
676 **(D)** Same as (C) but with different window-sizes (1, 2, 3, 5, 6, 10, 12, 15, 20, 30 and 60  
677 sec). Error bars indicate s.e.m. across animals ( $n = 7$ ).

678

679 **Figure 5. Comparison with simulated data indicated non-stationarity of the real**  
680 **data.** **(A)** Examples of real and simulated time courses. Simulated time course (black)  
681 was matched to real data (green; calcium) in mean spectral content (middle panels) and  
682 ROI-by-ROI covariance matrix (right panels). The same procedure was applied to  
683 create simulated hemodynamic data (not shown). **(B)** Cluster validity index calculated  
684 for different number of clusters ( $k = 2-10$ ). In both calcium (left) and hemodynamics  
685 (right), the cluster validity index was smaller for the real (solid lines) than the simulated  
686 data (dotted lines) indicating that the real data tended to be more clustered. **(C)** Kurtosis

687 of real and simulated covariance matrices. For both calcium (left) and hemodynamics  
688 (right), multivariate kurtosis was larger for the real than for the simulated data. Error  
689 bars indicate s.e.m. across animals ( $n = 7$ ).

690

691 **Supplementary Figure 1. Anatomical locations of ROIs.** Anatomical locations of 19  
692 ROIs are shown for the right hemisphere. Anatomical nomenclatures of ROIs are shown  
693 on the right. ROIs in the left hemisphere are taken at mirror symmetric positions to  
694 yield a total of 38 ROIs.

695

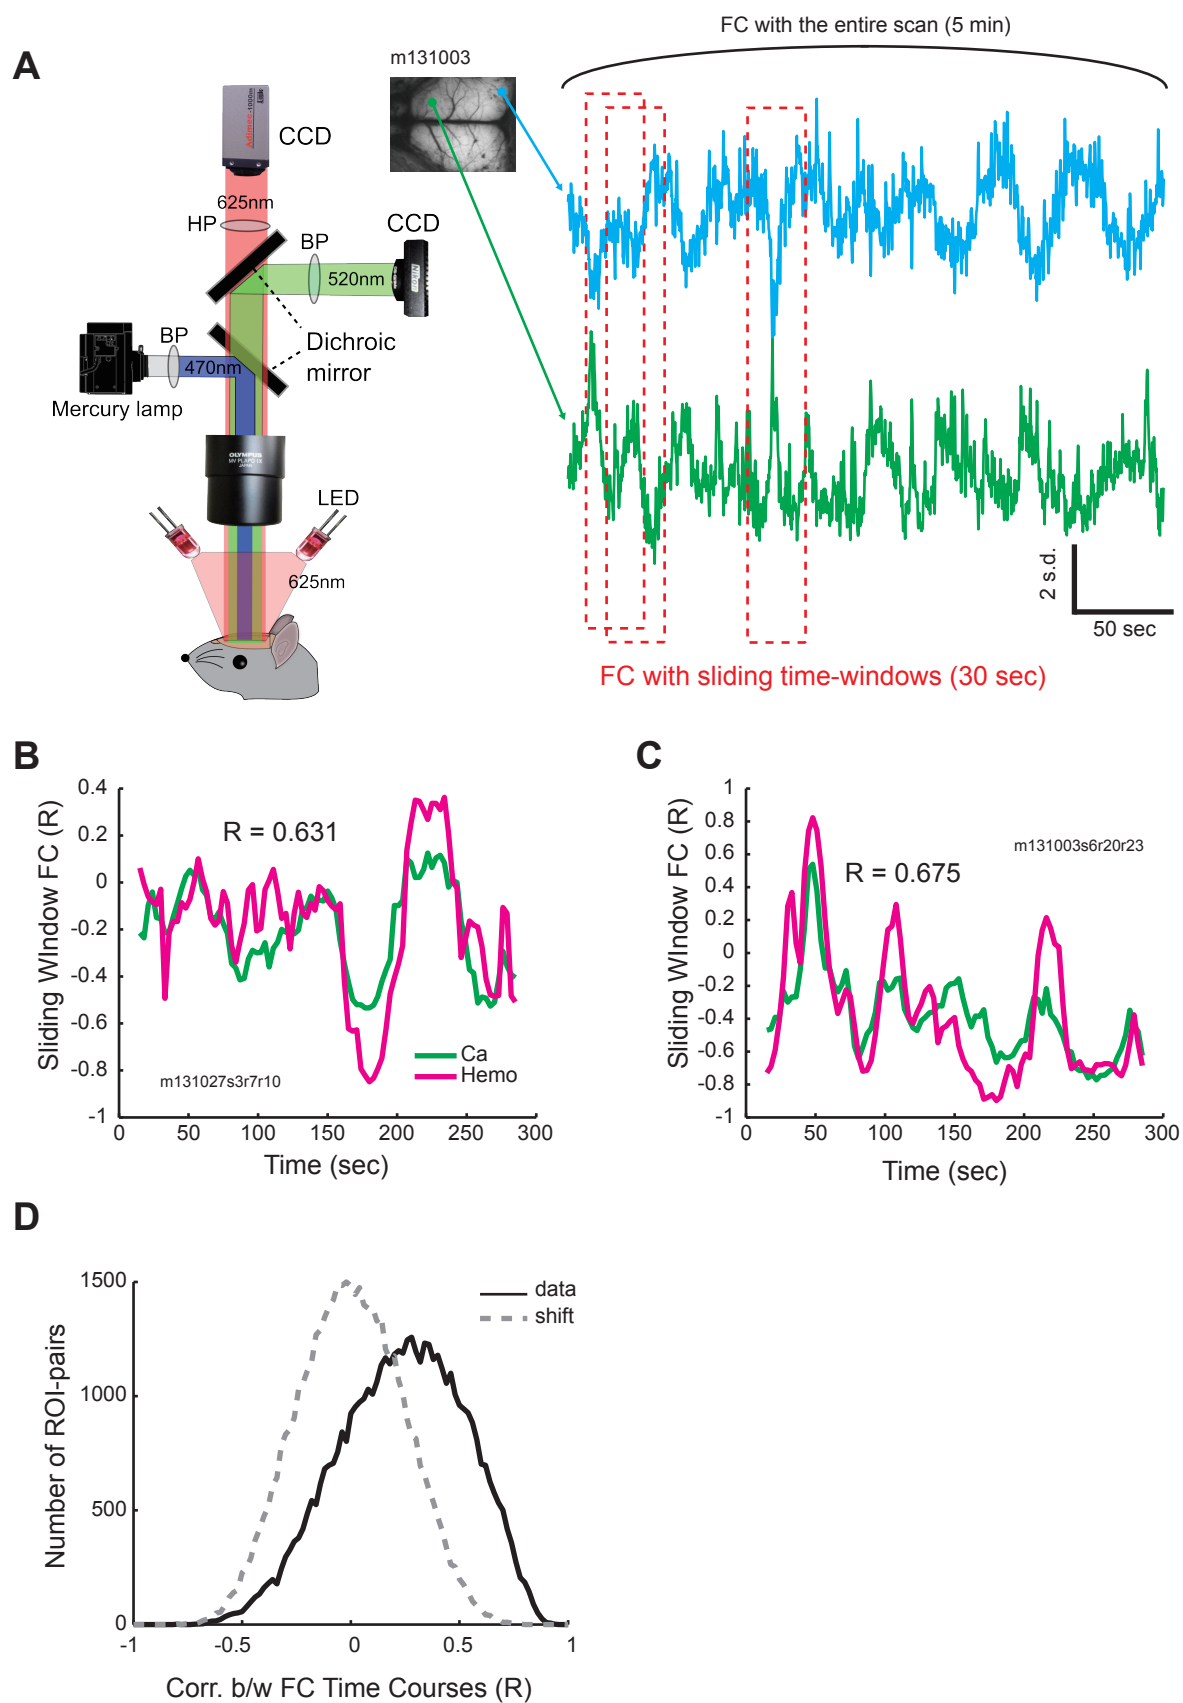

**Figure 1**

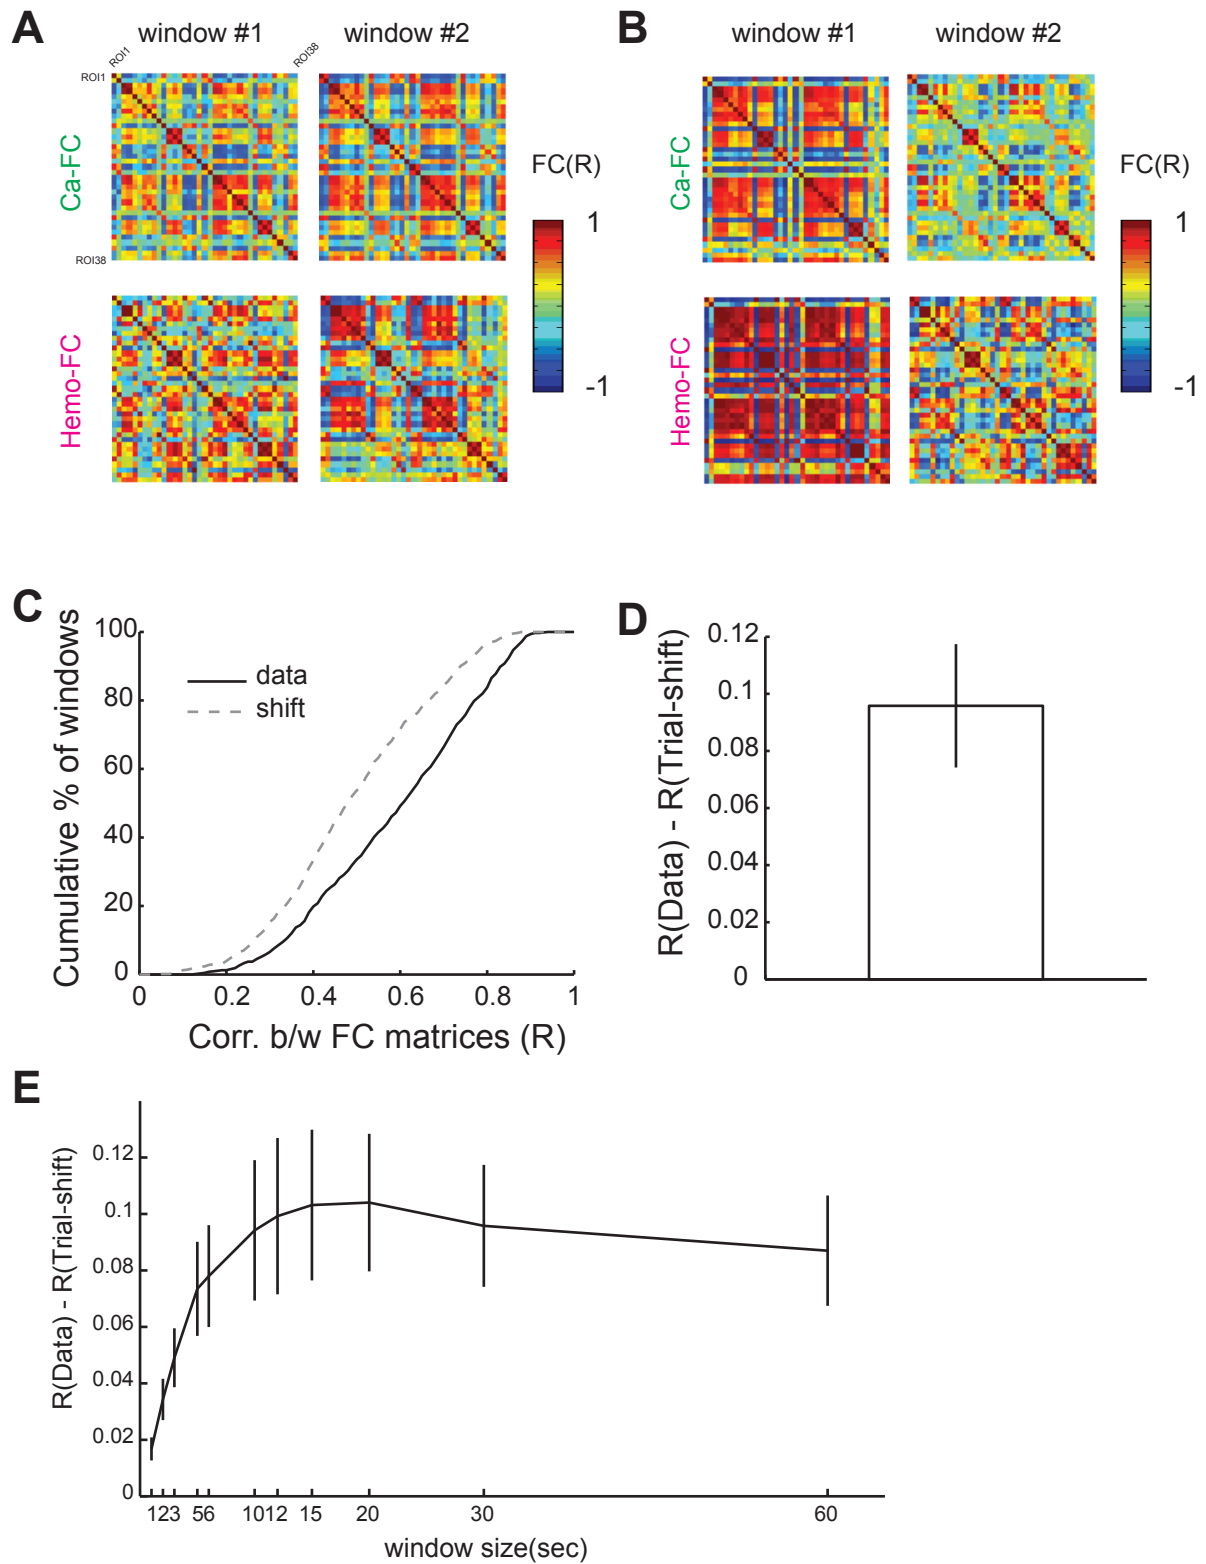

**Figure 2**

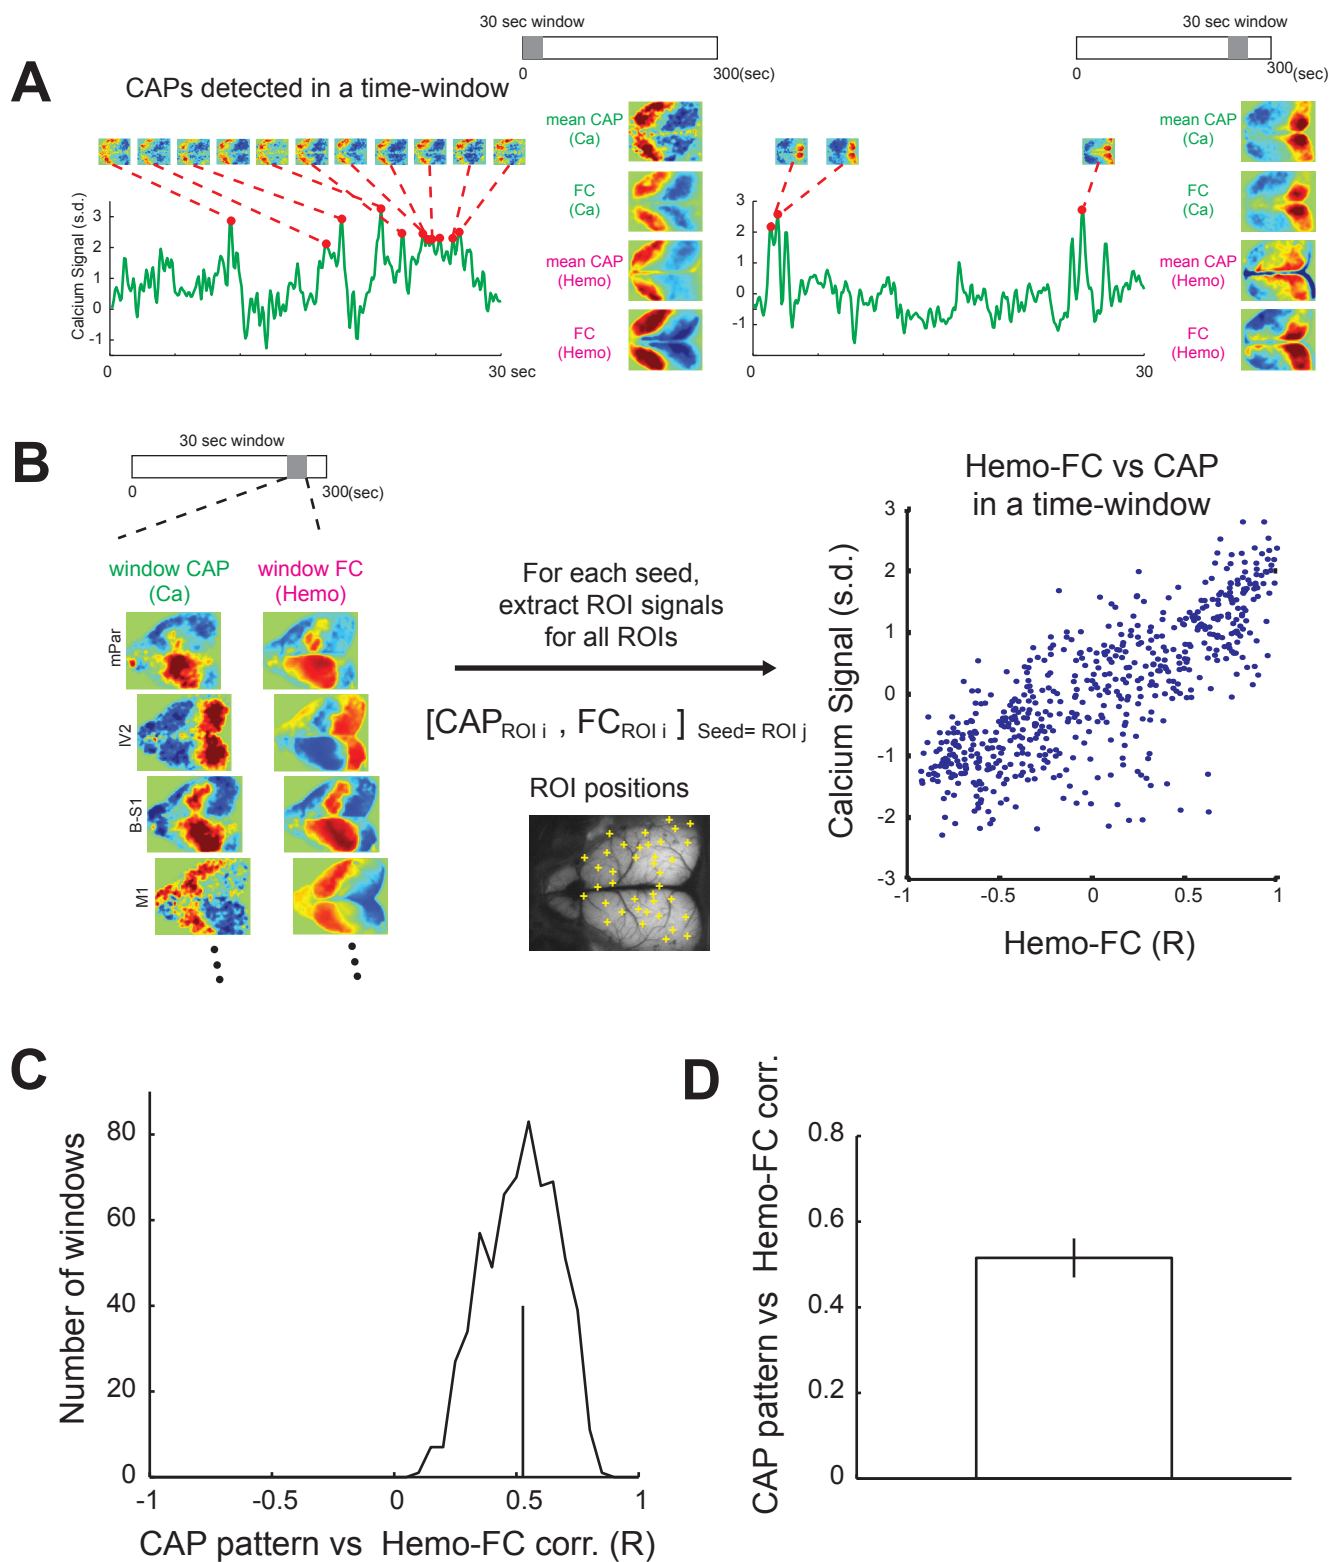

**Figure 3**

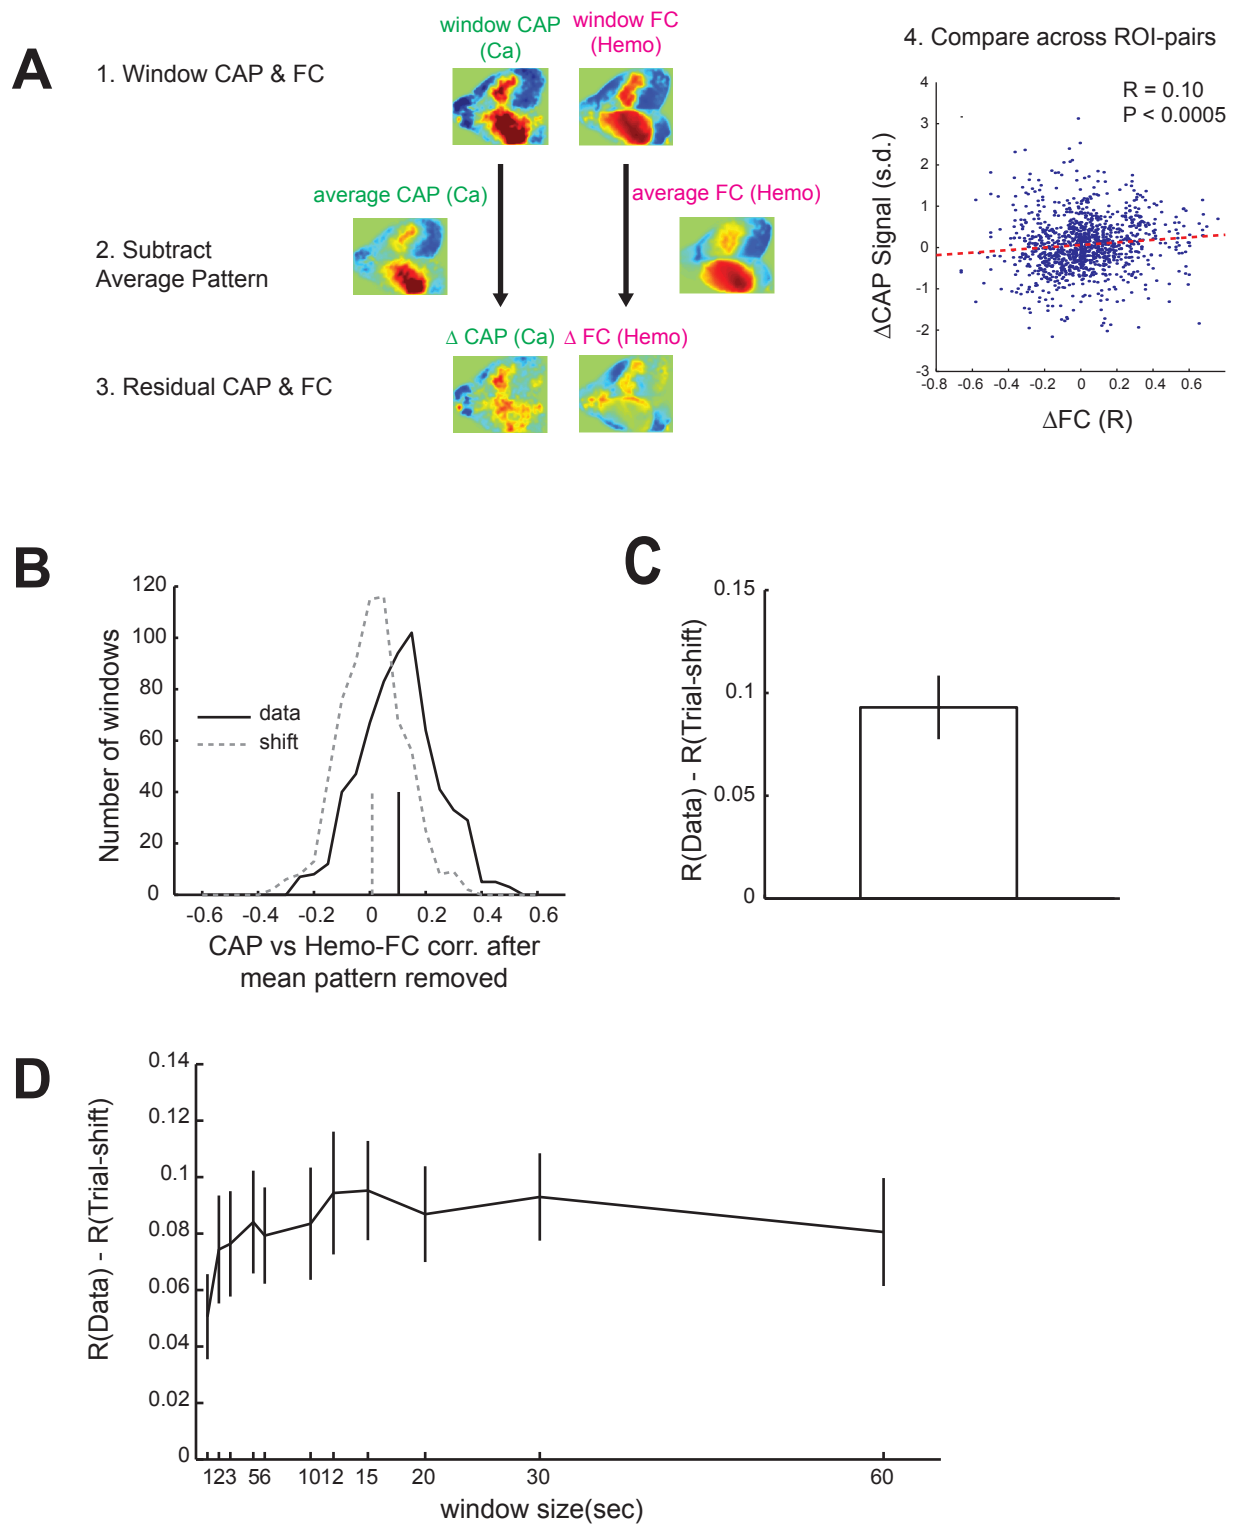

**Figure 4**

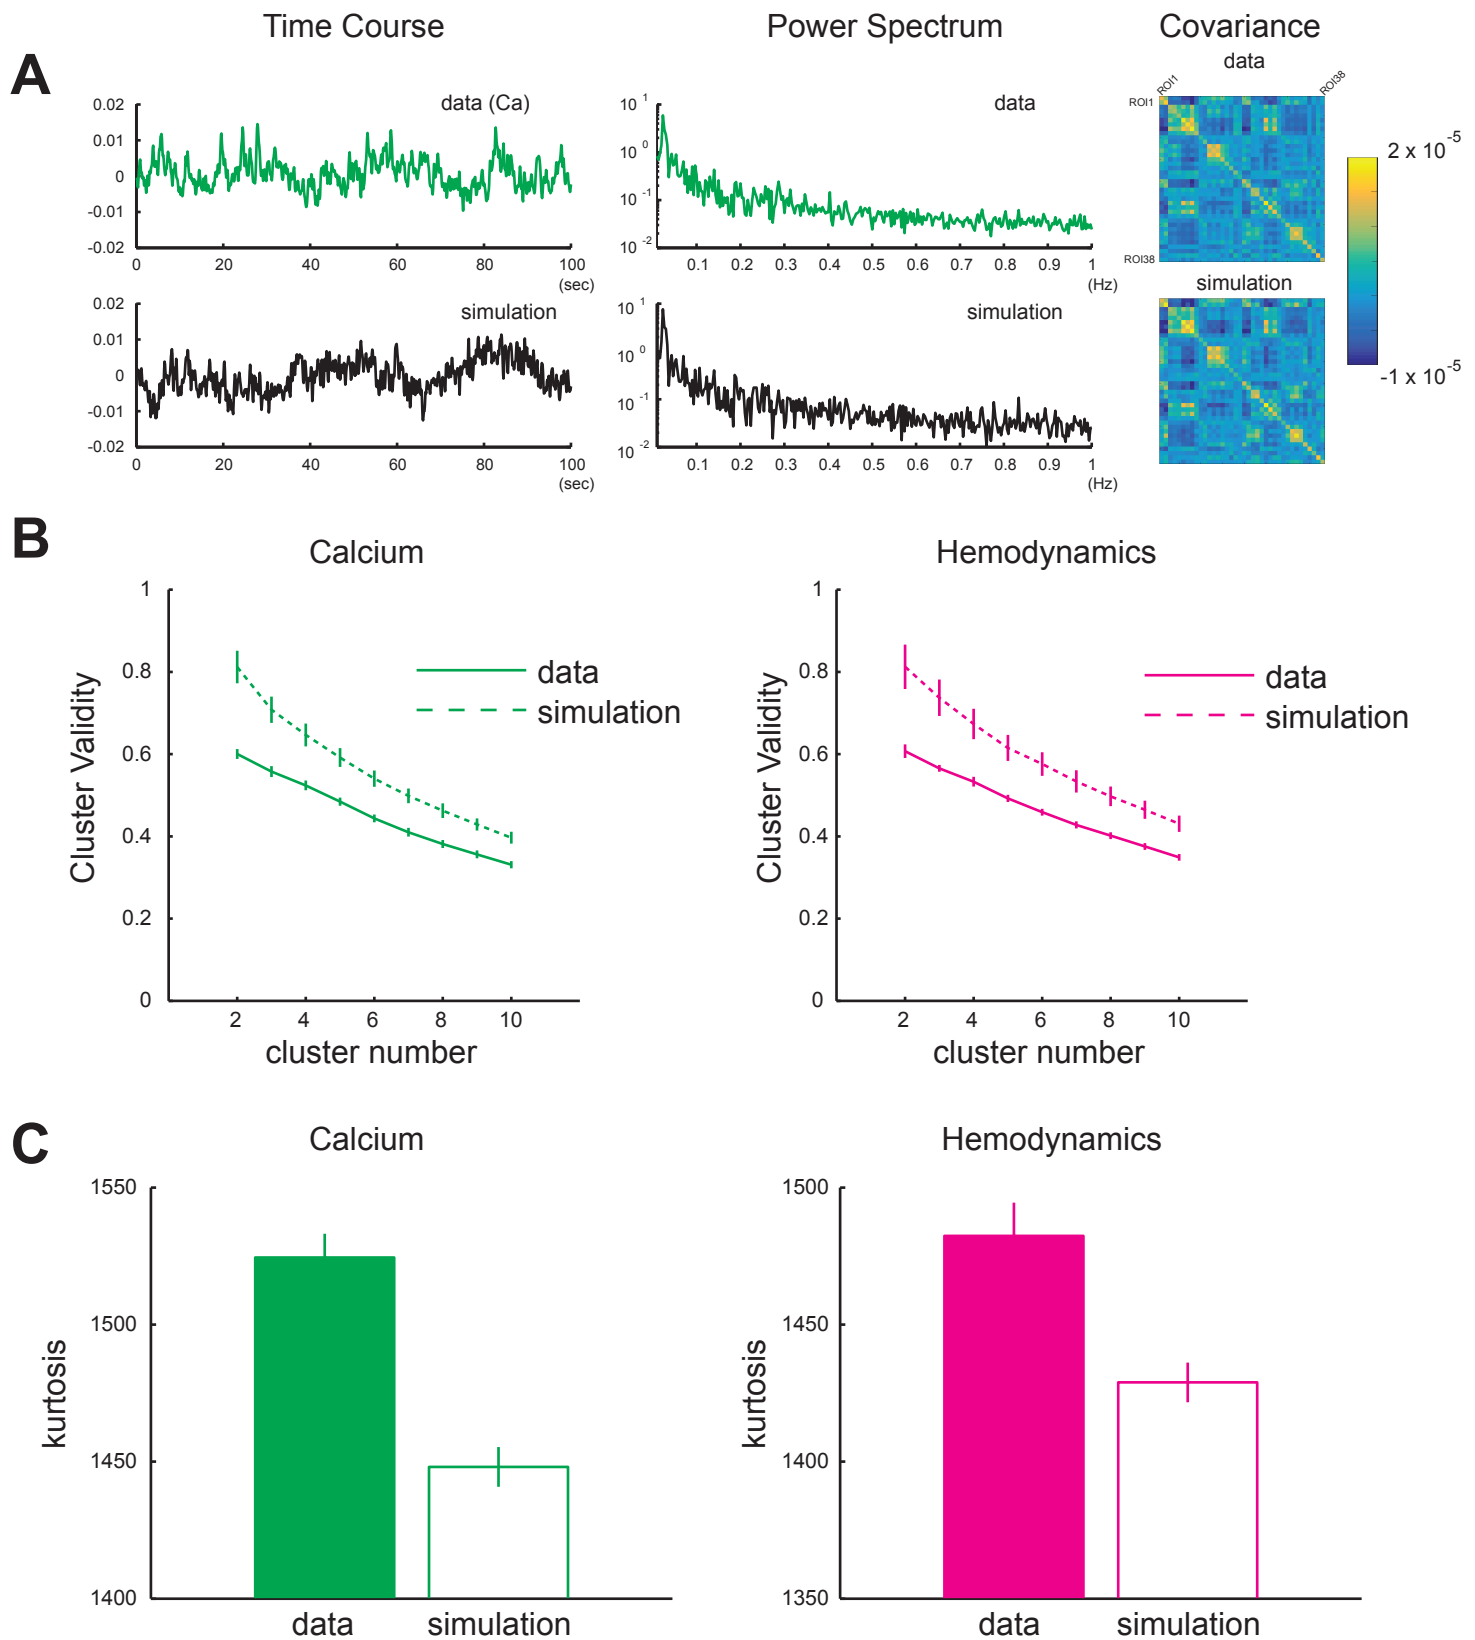

**Figure 5**

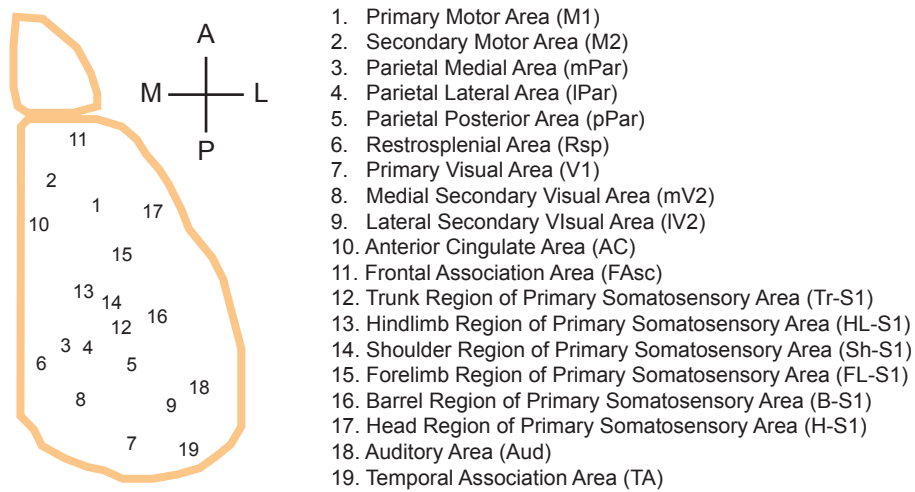

# Supplementary Figure 1
